# Supplementary material
Source: PubMed Central journal article supplement (PMC3675957)
Supplement: AEM.00598-13_zam999104454so1.pdf [file AEM.00598-13_zam999104454so1.pdf]

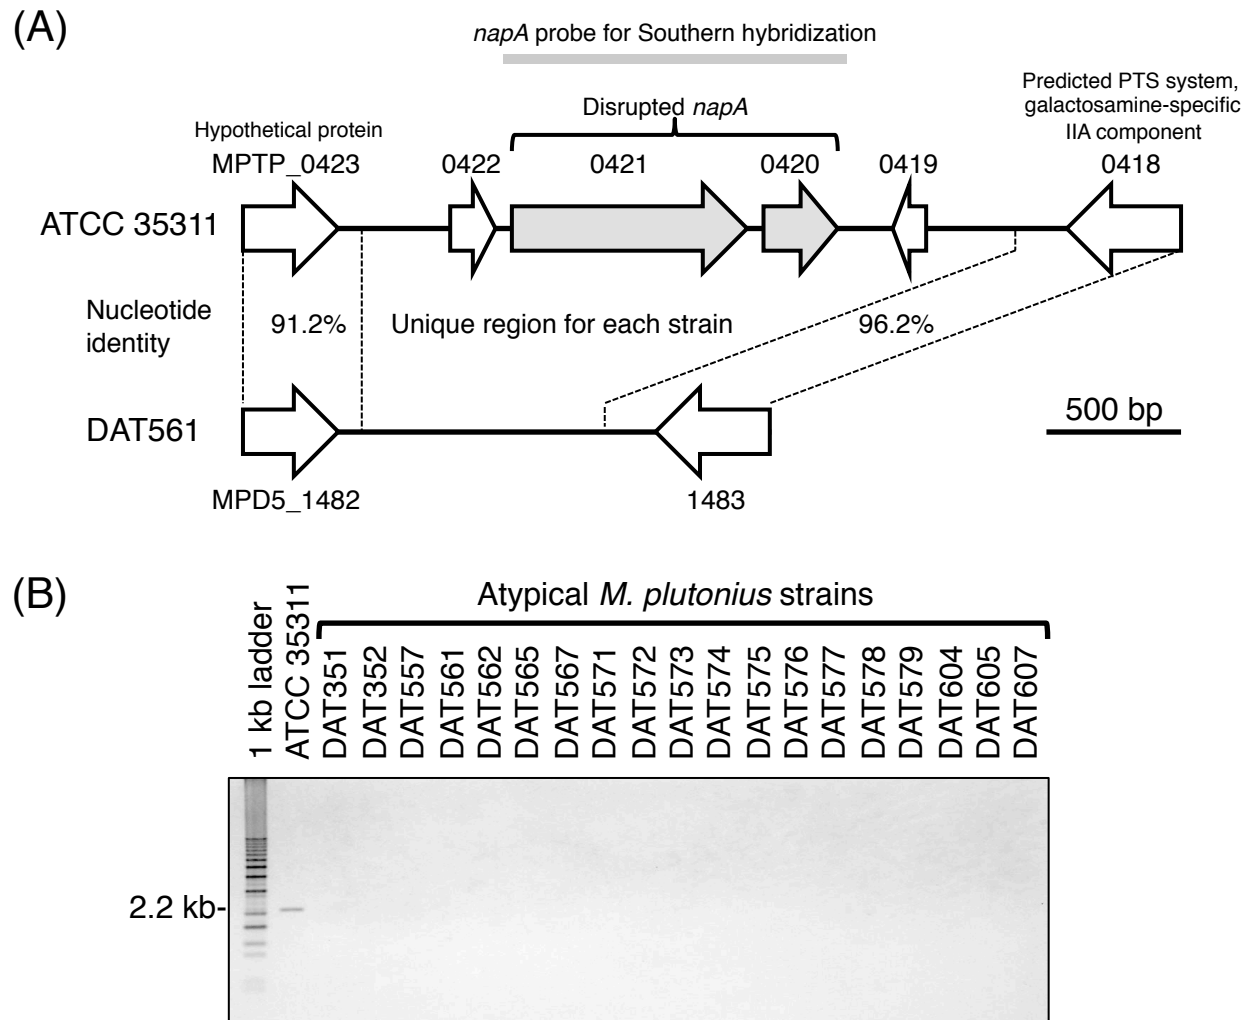

**FIG S1** (A) The genetic map of the *napA* region of *M. plutonius* ATCC 35311 (typical *M. plutonius*) and the corresponding region of DAT561 (atypical *M. plutonius*) and the position of *napA* probe used for Southern hybridization. (B) Genomic Southern hybridization analysis of *M. plutonius* by the *napA* probe. Type strain ATCC 35311 and atypical strains used in our previous study (5) were used for this analysis. The probe was prepared by amplification of the *napA* region from ATCC 35311 with primers MPTP0420-0421F1 and MPTP0420-0421R1 (Table S2) using PCR DIG labeling mix (Roche). Since there are no *Clal* sites in the *napA* gene of ATCC 35311, genomic DNA was digested with *Clal*. The probe hybridized with only a single *Clal* fragment in ATCC 35311, while no signal was detected in the atypical *M. plutonius* strains tested in this study.
