# Supplementary material
Source: PubMed Central journal article supplement (PMC3675957)
Supplement: AEM.00598-13_zam999104454so2.pdf [file AEM.00598-13_zam999104454so2.pdf]

**TABLE S1.** Cultural characteristics of *M. plutonius* and the culture variants under anaerobic conditions.

| Medium                                                                                                                    | Results for <sup>a</sup>                 |                                  |                                           |
|---------------------------------------------------------------------------------------------------------------------------|------------------------------------------|----------------------------------|-------------------------------------------|
|                                                                                                                           | <i>M. plutonius</i> ATCC 35311 (typical) | Culture variants from ATCC 35311 | Atypical <i>M. plutonius</i> <sup>b</sup> |
| Medium 1<br>(1% yeast extract, 1% glucose, 1% starch, 0.1M KH <sub>2</sub> PO <sub>4</sub> , 1.5% agar, pH 6.6)           | + <sup>v</sup>                           | + <sup>v</sup>                   | +                                         |
| Medium 6<br>(Medium 1, in which KH <sub>2</sub> PO <sub>4</sub> is replaced with 0.1 M NaH <sub>2</sub> PO <sub>4</sub> ) | –                                        | + <sup>v</sup>                   | + <sup>w</sup> or +                       |
| KSBHI agar<br>(BHI agar supplemented with 0.15M KH <sub>2</sub> PO <sub>4</sub> and 1% starch)                            | +                                        | +                                | +                                         |
| BHI agar<br>(Brain heart infusion agar)                                                                                   | –                                        | +                                | + <sup>v</sup>                            |

<sup>a</sup> For cultural characterization, bacteria were cultured on various media at 35-37°C for a week under anaerobic conditions using the Anaero Pack System (Mitsubishi Gas Chemical Co., Inc., Tokyo, Japan). The growth of ATCC 35311 cultured on KSBHI agar was scored as +. Compared to this growth, more vigorous and weaker growth was scored as +<sup>v</sup> and +<sup>w</sup>, respectively. No growth or only trace levels of growth was scored as –.

<sup>b</sup> Data from reference 5.
