# Supplementary material
Source: PubMed Central journal article supplement (PMC3675957)
Supplement: AEM.00598-13_zam999104454so3.pdf [file AEM.00598-13_zam999104454so3.pdf]

**TABLE S2.** Primers used in this study.

| Primer                                                                                                                                      | Sequence (5'-3')               | Description or reference                                                                                                               | Polymerase used for PCR        | MgCl <sub>2</sub> concentration | PCR program                                                           |
|---------------------------------------------------------------------------------------------------------------------------------------------|--------------------------------|----------------------------------------------------------------------------------------------------------------------------------------|--------------------------------|---------------------------------|-----------------------------------------------------------------------|
| <b>For amplification and sequencing of <i>napA</i> (MPTP_0420 and MPTP_0421) of ATCC 35311 and its corresponding genes of other strains</b> |                                |                                                                                                                                        |                                |                                 |                                                                       |
| MPTP0420-0421F1                                                                                                                             | GTCACAATGATTCATCTTGC           | Used for amplification and sequencing. This primer was also used for preparation of <i>napA</i> probe (see below).                     | Ex Taq DNA polymerase (Takara) | 1.5 mM                          | 95°C 2min - 95°C 20sec, 55°C 10sec, 72°C 1min (30 cycles) - 72°C 2min |
| MPTP0420-0421R1                                                                                                                             | TGACTTTTCAAGGGGTGAGA           | Used for amplification and sequencing. This primer was also used for preparation of <i>napA</i> probe (see below).                     |                                |                                 |                                                                       |
| MPTP0420-0421F2                                                                                                                             | CAGCAAGATAGGACATTCCA           | Used only for sequencing.                                                                                                              |                                |                                 |                                                                       |
| MPTP0420-0421R2                                                                                                                             | TGGAATGCCTATCTTGCTG            | Used only for sequencing.                                                                                                              |                                |                                 |                                                                       |
| <b>For amplification and sequencing of <i>nhpP</i> (MPTP_1078) of ATCC 35311 and its corresponding gene of other strains</b>                |                                |                                                                                                                                        |                                |                                 |                                                                       |
| MPTP1078F1                                                                                                                                  | TTAGAAGCTAAATGGGCACAATGT       | Used for amplification and sequencing.                                                                                                 | Ex Taq DNA polymerase (Takara) | 1.5 mM                          | 95°C 2min - 95°C 20sec, 55°C 10sec, 72°C 2min (32 cycles) - 72°C 7min |
| MPTP1078R1                                                                                                                                  | CGAATGAATGTTAAAGGAGAGGTG       | Used for amplification and sequencing.                                                                                                 |                                |                                 |                                                                       |
| MPTP1078F2                                                                                                                                  | TGTGTTGGCTGGACGCTACA           | Used only for sequencing.                                                                                                              |                                |                                 |                                                                       |
| MPTP1078F3                                                                                                                                  | GCCGCTGTAGTTGCCGGTGT           | Used only for sequencing.                                                                                                              |                                |                                 |                                                                       |
| MPTP1078R2                                                                                                                                  | GATGACCGTCGTATTTCCG            | Used only for sequencing.                                                                                                              |                                |                                 |                                                                       |
| MPTP1078R3                                                                                                                                  | TGTGTCCATTCTTGTTTCCAC          | Used only for sequencing.                                                                                                              |                                |                                 |                                                                       |
| <b>For amplification and sequencing of <i>ctaM</i> (MPTP_1579) of ATCC 35311 and its corresponding gene of other strains</b>                |                                |                                                                                                                                        |                                |                                 |                                                                       |
| MPD5_0470F                                                                                                                                  | AAGACTGCAGCTAAACTGTGGAAAAGGGGA | Used for amplification and sequencing. This primer was also used for construction of pDAT561CtaM (see below). PstI site is underlined. | Ex Taq DNA polymerase (Takara) | 1.5 mM                          | 95°C 2min - 95°C 20sec, 55°C 10sec, 72°C 2min (32 cycles) - 72°C 7min |
| MPD5_0470R                                                                                                                                  | AACTCTGCAGCTAATGAGGATTATCTA    | Used for amplification and sequencing. This primer was also used for construction of pDAT561CtaM (see below). PstI site is underlined. |                                |                                 |                                                                       |
| MPTP1579F2                                                                                                                                  | GAACCAGATACCTTCTGATG           | Used only for sequencing.                                                                                                              |                                |                                 |                                                                       |
| MPTP1579F3                                                                                                                                  | AGAAACTCTAGCAAGAGTGG           | Used only for sequencing.                                                                                                              |                                |                                 |                                                                       |
| MPTP1579F4                                                                                                                                  | CTGGTGATAATCCAATCACT           | Used only for sequencing.                                                                                                              |                                |                                 |                                                                       |
| MPTP1579F5                                                                                                                                  | TTTTGGCTCTACGTCCAAGT           | Used only for sequencing.                                                                                                              |                                |                                 |                                                                       |
| MPTP1579R2                                                                                                                                  | ACAAGCGCTTTTCAGGATAG           | Used only for sequencing.                                                                                                              |                                |                                 |                                                                       |
| <b>For amplification and sequencing of <i>ctaP</i> (MPTP_1629) of ATCC 35311 and its corresponding gene of other strains</b>                |                                |                                                                                                                                        |                                |                                 |                                                                       |
| MPTP1629F5                                                                                                                                  | CATGCTATAGTGAAAGAAGATAGC       | Used for amplification and sequencing.                                                                                                 | Ex Taq DNA polymerase (Takara) | 1.5 mM                          | 95°C 2min - 95°C 20sec, 55°C 10sec, 72°C 2min (30 cycles) - 72°C 5min |
| MPTP1629R6                                                                                                                                  | CACCCACACTCCTTCATCCT           | Used for amplification and sequencing.                                                                                                 |                                |                                 |                                                                       |
| MPTP1629F1                                                                                                                                  | GGGGGCTTTTGACGTATTGG           | Used only for sequencing.                                                                                                              |                                |                                 |                                                                       |
| MPTP1629F3                                                                                                                                  | TTGCAGATGGATTACCAGGA           | Used only for sequencing.                                                                                                              |                                |                                 |                                                                       |
| MPTP1629F4                                                                                                                                  | GATACAATGACCGATGAAGC           | Used only for sequencing.                                                                                                              |                                |                                 |                                                                       |
| MPTP1629R1                                                                                                                                  | CATTACATTCGCACCAATG            | Used only for sequencing.                                                                                                              |                                |                                 |                                                                       |
| MPTP1629R3                                                                                                                                  | ACCAACAGTAATTACACGCA           | Used only for sequencing.                                                                                                              |                                |                                 |                                                                       |
| MPTP1629R4                                                                                                                                  | TCTACGGATAATTGCATGCT           | Used only for sequencing.                                                                                                              |                                |                                 |                                                                       |
| MPTP1629R5                                                                                                                                  | ACTGGAATCATTGCTCCAAC           | Used only for sequencing.                                                                                                              |                                |                                 |                                                                       |
| <b>For preparation of <i>napA</i> probe</b>                                                                                                 |                                |                                                                                                                                        |                                |                                 |                                                                       |
| MPTP0420-0421F1                                                                                                                             | GTCACAATGATTCATCTTGC           |                                                                                                                                        | Ex Taq DNA polymerase (Takara) | 2.5 mM                          | 95°C 2min - 95°C 20sec, 55°C 10sec, 72°C 1min (35 cycles) - 72°C 2min |
| MPTP0420-0421R1                                                                                                                             | TGACTTTTCAAGGGGTGAGA           |                                                                                                                                        |                                |                                 |                                                                       |
| <b>For construction of pMX2</b>                                                                                                             |                                |                                                                                                                                        |                                |                                 |                                                                       |

|                                                  |                                            |                                                                                                                                   |                                |        |                                                                       |
|--------------------------------------------------|--------------------------------------------|-----------------------------------------------------------------------------------------------------------------------------------|--------------------------------|--------|-----------------------------------------------------------------------|
| pMX-F                                            | CAAT <u>CTCGAGG</u> GACATCTGCCAGCTCTCG     | For amplification of the replication origin, <i>malX</i> promoter, and multiple cloning sites from pMX1. XhoI site is underlined. | iProof (Bio-Rad)               | 1.5 mM | 98°C 1min - 98°C 20sec, 58°C 10sec, 72°C 3min (30 cycles) - 72°C 5min |
| pMX-R                                            | TCAC <u>CTCGAGAT</u> CTCGGTGATGACGGTG      | For amplification of the replication origin, <i>malX</i> promoter, and multiple cloning sites from pMX1. XhoI site is underlined. |                                |        |                                                                       |
| catF2                                            | CGAT <u>CTCGAGT</u> CACCGAACTAGAGCTTG      | For amplification of the <i>cat</i> gene from pSET6s. XhoI site is underlined.                                                    | iProof (Bio-Rad)               | 1.5 mM | 98°C 1min - 98°C 20sec, 58°C 10sec, 72°C 3min (30 cycles) - 72°C 5min |
| catR2                                            | AGT <u>TCTCGAGT</u> TTCCGATAATTCGATGG      | For amplification of the <i>cat</i> gene from pSET6s. XhoI site is underlined.                                                    |                                |        |                                                                       |
| <b>For preparation of <i>cat</i> probe</b>       |                                            |                                                                                                                                   |                                |        |                                                                       |
| catIF                                            | ATAGCGACGGAGAGTTAGGT                       |                                                                                                                                   |                                |        |                                                                       |
| catIR                                            | CTGACAATTCCTGAATAGAG                       |                                                                                                                                   | Ex Taq DNA polymerase (Takara) | 2.5 mM | 95°C 2min - 95°C 20sec, 55°C 10sec, 72°C 1min (35 cycles) - 72°C 2min |
| <b>For identification of <i>M. plutonius</i></b> |                                            |                                                                                                                                   |                                |        |                                                                       |
| <i>M. plutonius</i> -specific primer 1           | GAAGAGGAGTTAAAAGGCGC                       | Reference 13                                                                                                                      |                                |        |                                                                       |
| <i>M. plutonius</i> -specific primer 2           | TTATCTCTAAGCGTTCAAAGG                      | Reference 13                                                                                                                      | Ex Taq DNA polymerase (Takara) | 2.0 mM | 95°C 1min - 93°C 1min, 55°C 30sec, 72°C 1min (30 cycles) - 72°C 5min  |
| <b>For construction of pMX2lacZ</b>              |                                            |                                                                                                                                   |                                |        |                                                                       |
| LacZ1                                            | GCAGACGCGTCGACGTCATAT <u>GGATC</u>         | A part of BamHI site is underlined.                                                                                               | iProof (Bio-Rad)               | 1.5 mM | 98°C 2min - 98°C 10sec, 55°C 10sec, 72°C 2min (35 cycles) - 72°C 5min |
| LacZ2.2                                          | GGGA <u>ATTC</u> CGGGAAAAACGGGAAGTAGGCTCC  | EcoRI site is underlined.                                                                                                         |                                |        |                                                                       |
| <b>For construction of pDAT628NapA</b>           |                                            |                                                                                                                                   |                                |        |                                                                       |
| MPTP0420-0421F3                                  | AGCT <u>CTGCAGT</u> TTATAAAAAGAAAGAGGATG   | PstI site is underlined.                                                                                                          | iProof (Bio-Rad)               | 1.5 mM | 98°C 1min - 98°C 20sec, 52°C 10sec, 72°C 1min (30 cycles) - 72°C 2min |
| MPTP0420-0421R3                                  | AATCAAGATTTATTTAGTGG                       |                                                                                                                                   |                                |        |                                                                       |
| <b>For construction of pDAT561CtaP</b>           |                                            |                                                                                                                                   |                                |        |                                                                       |
| MPD5_0425F                                       | AGAT <u>CTGCAGT</u> TATAATAGAAGGAAAATGGGGG | PstI site is underlined.                                                                                                          | iProof (Bio-Rad)               | 1.5 mM | 98°C 2min - 98°C 10sec, 55°C 10sec, 72°C 2min (30 cycles) - 72°C 5min |
| MPD5_0425R                                       | TCTAGGATCCATTTAATCATTTCATCATTGGGT          | BamHI site is underlined.                                                                                                         |                                |        |                                                                       |
| <b>For construction of pDAT561CtaM</b>           |                                            |                                                                                                                                   |                                |        |                                                                       |
| MPD5_0470F                                       | AAGAC <u>CTGCAG</u> CTAAACTGTGAAAAGGGGA    | PstI site is underlined.                                                                                                          | iProof (Bio-Rad)               | 1.5 mM | 98°C 2min - 98°C 10sec, 55°C 10sec, 72°C 2min (30 cycles) - 72°C 5min |
| MPD5_0470R                                       | AACT <u>CTGCAG</u> CTAATGAGGATTATCTA       | PstI site is underlined.                                                                                                          |                                |        |                                                                       |
| <b>For construction of pDAT561NhaP</b>           |                                            |                                                                                                                                   |                                |        |                                                                       |
| MPD5_0870F                                       | GAAAC <u>CTGCAG</u> ACATGTATTGGTAAGAAAGT   | PstI site is underlined.                                                                                                          | iProof (Bio-Rad)               | 1.5 mM | 98°C 2min - 98°C 10sec, 52°C 10sec, 72°C 2min (35 cycles) - 72°C 5min |
| MPD5_0870R                                       | TTCT <u>CTGCAG</u> TCCCTTTTCCTTCTATCCAT    | PstI site is underlined.                                                                                                          |                                |        |                                                                       |
